# Supplementary material
Source: MDPI journal article supplement (https://www.mdpi.com/2227-9717/11/4/1042)
Supplement: s1 [file s1]

*Supporting Information*

**Metalloporphyrin-based Metal-organic Frameworks for  
Photocatalytic Carbon Dioxide Reduction: The Influence of  
Metal Centers**

Qian Li, Keke Wang,\* Heyu Wang, Mengmeng Zhou, Bolin Zhou, Yanzhe Li, Qiang  
Li, Qin Wang, Hai-Min Shen, Yuanbin She\*

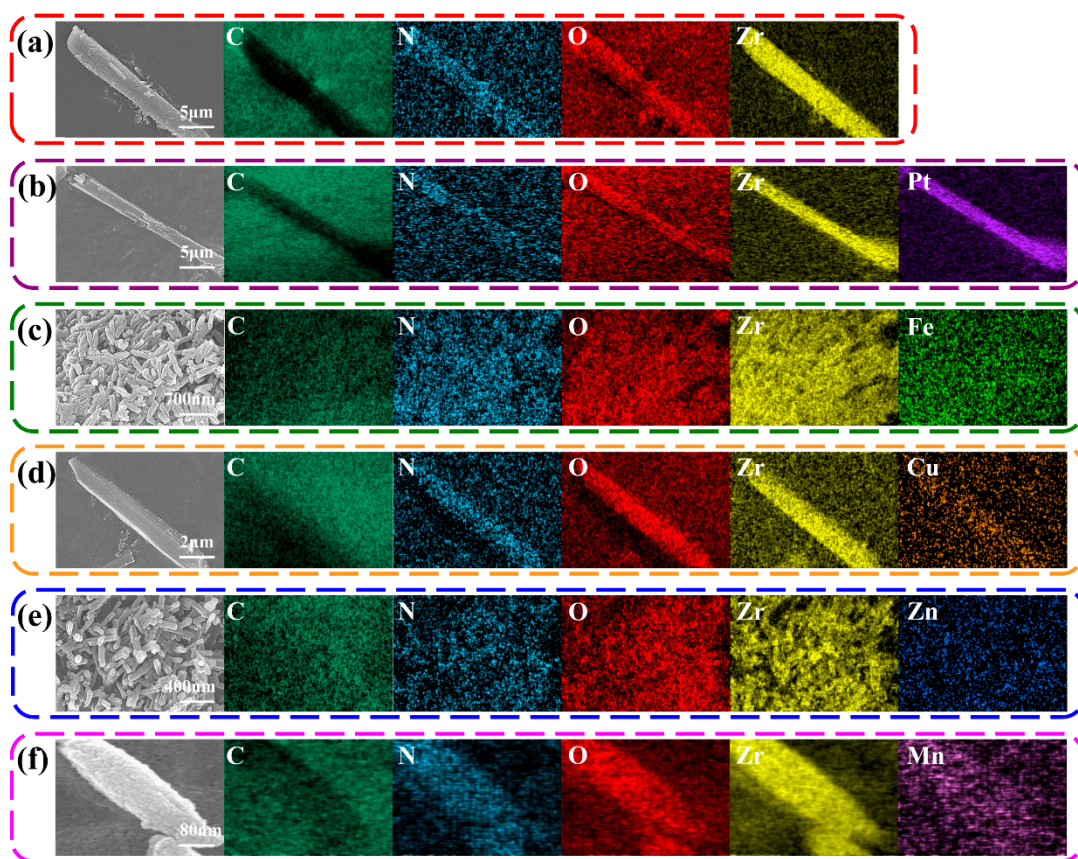

Figure S1. EDX-mapping images of (a) PCN-222(2H), (b) PCN-222(2H&Pt), (c) PCN-222(2H&Fe), (d) PCN-222(2H&Cu), (e) PCN-222(2H&Zn) and (f) PCN-222(2H&Mn), respectively.

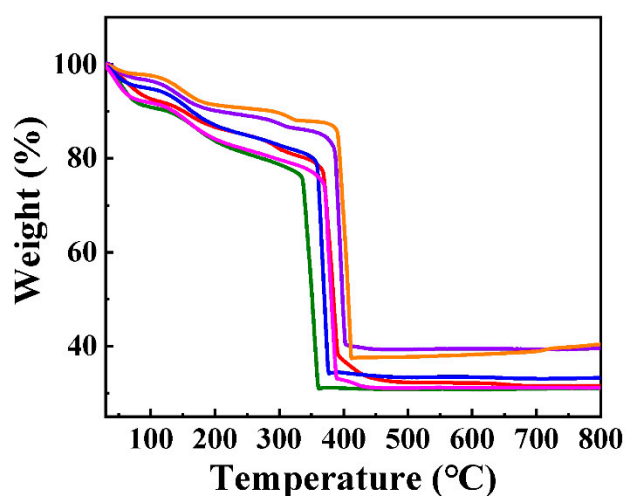

Figure S2. TGA curves of PCN-222(2H) and PCN-222(2H&M).

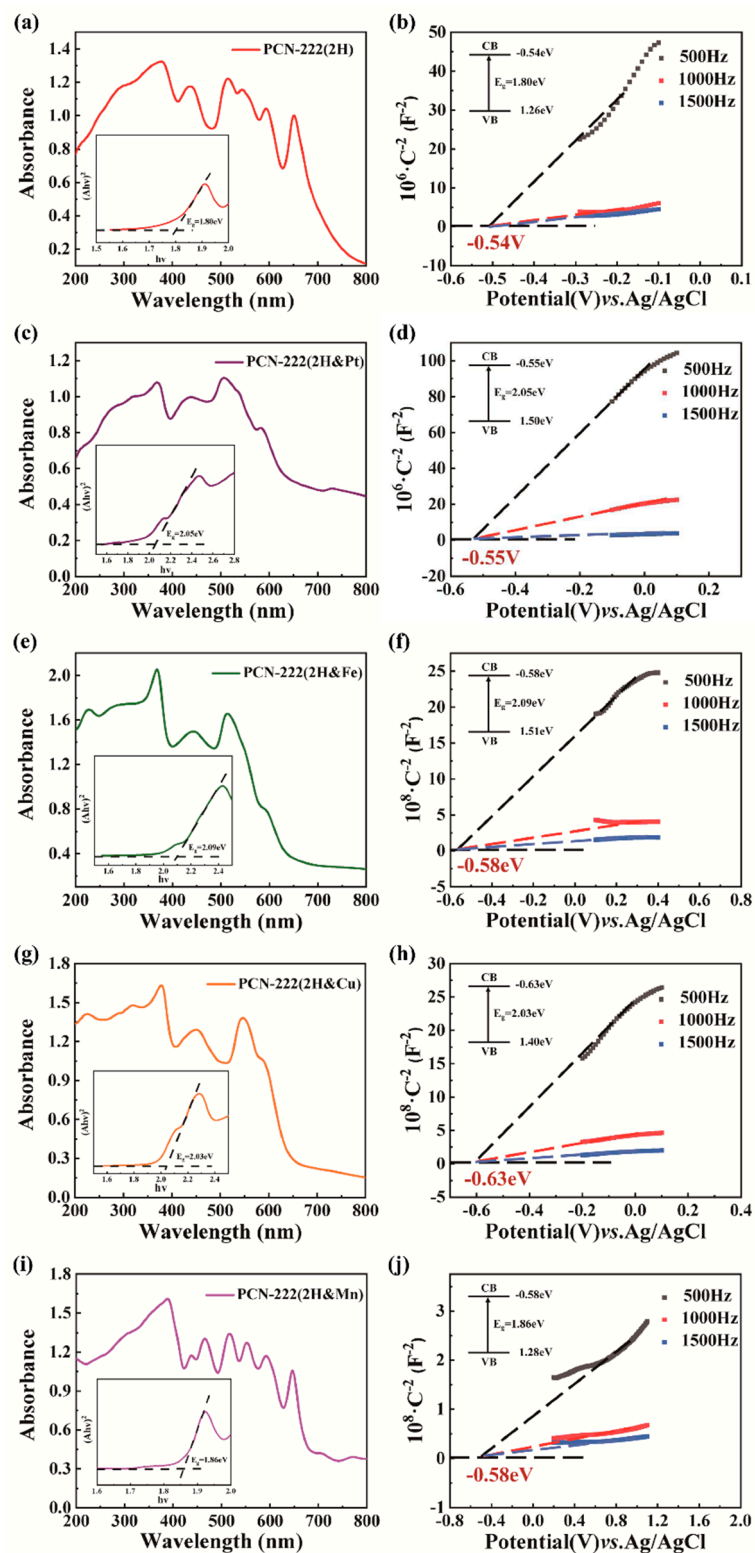

Figure S3. (a) UV-vis diffusion spectra and Tauc plot of PCN-222(2H), (b) Mott-Schottky plots of PCN-222(2H), (c) UV-vis diffusion spectra and Tauc plot of PCN-222(2H&Pt), (d) Mott-Schottky plots of PCN-222(2H&Pt), (e) UV-vis diffusion spectra and Tauc plot of PCN-222(2H&Fe), (f) Mott-Schottky plots of PCN-

222(2H&Fe), (g) UV-vis diffusion spectra and Tauc plot of PCN-222(2H&Cu), (h) Mott-Schottky plots of PCN-222(2H&Cu), (i) UV-vis diffusion spectra and Tauc plot of PCN-222(2H&Mn), and (j) Mott-Schottky plots of PCN-222(2H&Mn).

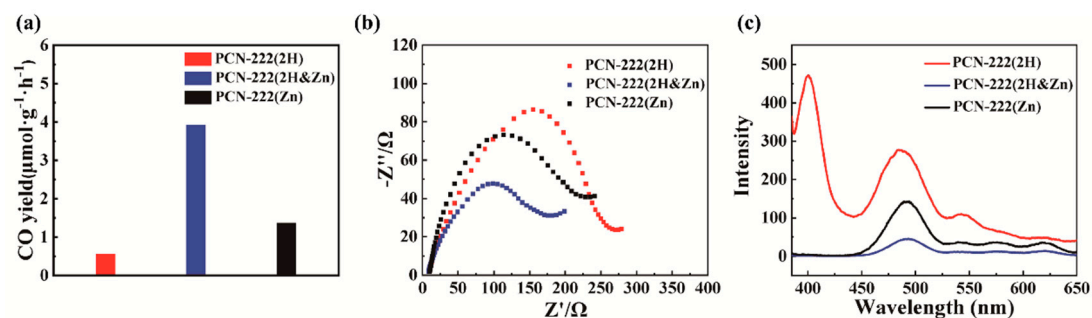

Figure S4. (a) The average CO yield, (b) EIS and (c) solid-state PL spectra excited at  $\lambda = 350$  nm of PCN-222(2H), PCN-222(2H&Zn) and PCN-222(Zn).

Table S1. Structural characteristics of PCN-222 materials

|    | SSA/m <sup>2</sup> ·g <sup>-1</sup> | $V_{\text{total}}/\text{cm}^3\text{ g}^{-1}$ | $V_{\text{micro}}$ | $V_{\text{meso}}$ | $V_{\text{meso}}/V_{\text{micro}}$ |
|----|-------------------------------------|----------------------------------------------|--------------------|-------------------|------------------------------------|
| 2H | 1553                                | 1.09                                         | 0.33               | 0.72              | 2.15                               |
| Zn | 1350                                | 0.85                                         | 0.25               | 0.57              | 2.29                               |
| Cu | 1249                                | 0.75                                         | 0.22               | 0.49              | 2.19                               |
| Pt | 1126                                | 0.68                                         | 0.23               | 0.43              | 1.92                               |
| Fe | 1124                                | 0.69                                         | 0.20               | 0.45              | 2.29                               |
| Mn | 1071                                | 0.45                                         | 0.10               | 0.29              | 2.86                               |

Table S2. Summary of photocatalytic CO<sub>2</sub> reduction performances of porphyrin-based MOFs materials in water or water vapor without the use of any organic solvent, photosensitizer, and sacrificial reagent.

| Photocatalyst                   | Reaction condition                       | Products                                                    | References                                                     |
|---------------------------------|------------------------------------------|-------------------------------------------------------------|----------------------------------------------------------------|
| PCN-224(Cu)                     | CO <sub>2</sub> , H <sub>2</sub> O       | CO: 3.717 μmol/(g·h)<br>CH <sub>4</sub> : 1.357 μmol/(g·h)  | <i>ACS Sustainable Chem. Eng.</i> <b>2019</b> , 7, 15660       |
| 15%PCN-224(Cu)/TiO <sub>2</sub> | CO <sub>2</sub> , H <sub>2</sub> O       | CO: 37.21 μmol/(g·h)<br>CH <sub>4</sub> : 0.2113 μmol/(g·h) |                                                                |
| TiO <sub>2</sub>                | CO <sub>2</sub> , H <sub>2</sub> O       | CO: 0.8183 μmol/(g·h)                                       |                                                                |
| PCN-601                         | CO <sub>2</sub> , H <sub>2</sub> O vapor | CO: 6.0 μmol/(g·h)<br>CH <sub>4</sub> : 10.1 μmol/(g·h)     | <i>J. Am. Chem. Soc.</i> <b>2020</b> , 142, 12515              |
| PCN-222                         | CO <sub>2</sub> , H <sub>2</sub> O vapor | CO: 5.5 μmol/(g·h)<br>CH <sub>4</sub> : 3.5 μmol/(g·h)      |                                                                |
| Ni <sub>3</sub> TCPP            | CO <sub>2</sub> , H <sub>2</sub> O vapor | CO: 1.5 μmol/(g·h)<br>CH <sub>4</sub> : 0.6 μmol/(g·h)      |                                                                |
| PCN-222(Cu)                     | CO <sub>2</sub> , H <sub>2</sub> O       | CO: ~0.2 μmol/(g·h)                                         | <i>Wuli Huaxue Xuebao.</i> <b>2020</b> , 36, 19050861-19050868 |
| 10%PCN-222(Cu)/TiO <sub>2</sub> | CO <sub>2</sub> , H <sub>2</sub> O       | CO: 13.24 μmol/(g·h)<br>CH <sub>4</sub> : 1.73 μmol/(g·h)   |                                                                |
